# Supplementary material
Source: ML conference proceedings conference paper supplement (https://openreview.net/forum?id=rlH3e7VlY8)
Supplement: supplementary_material [file Appendix_Formatting_Instructions_For_NeurIPS_2025_v3.pdf › Appendix_Formatting_Instructions_For_NeurIPS_2025_v3.pdf]

## A Related work

### A.1 Autoregressive Neural Solvers

Autoregressive neural solvers have emerged as a prominent research direction in the field of NCO. These methods typically employ an encoder-decoder architecture, where the encoder generates node embeddings, and the decoder dynamically produces a sequence of nodes.

Early works were based on Pointer Networks[30], gradually evolving from supervised learning to reinforcement learning training[1, 25]. Subsequently, the Transformer framework was introduced and has become a mainstream paradigm[16]. POMO[17] further leverages the symmetry of the VRP, optimizing the baseline calculation in RL training and enhancing the exploration diversity of the model. Subsequent research has largely focused on improving the Transformer framework [18, 35, 14, 15, 43, 27, 38]. However, these approaches predominantly adopt a heavy encoder light decoder structure, which poses challenges in handling large-scale problems. To enhance the capability of addressing large instances, some methods continue to build upon HELD. Examples include ELG[9], which integrates local search strategies; INVIT[7], which utilizes K-nearest neighbor multi-view embeddings to enhance local information; and ICAM[40], which introduces instance-conditional adaptation to better perceive problem scales. On the other hand, some studies[23, 5] have explored heavy decoder architectures. By dynamically capturing the relationships between remaining nodes during the decoding process, these methods demonstrate superior generalization performance on large-scale problems. However, their high computational demands, often necessitating training on labeled data, represent a significant limitation. Furthermore, decomposition-based methods[12, 36, 39, 24] warrant attention. These approaches decompose large-scale problems into multiple smaller subproblems for solving, and autoregressive solvers can be employed at the lower level to address these subproblems.

### A.2 Multi-Task Learning for Solving VRPs

To enhance the generalizability of neural solvers across diverse VRP variants, several existing methods have proposed unified multi-task models. For instance, Wang et al.[31] employs a multi-armed bandit approach to achieve efficient training across multiple combinatorial optimization problems. Lin et al.[20] pre-train a Transformer backbone on the Traveling Salesman Problem and fine-tune it for specific VRP variants, thereby extending its applicability to a subset of VRP problems. These methods represent initial attempts at cross-problem learning but are limited in scope, focusing primarily on a small number of problems. Building on these foundations, MT-POMO [21] views VRP variants as combinations of distinct attributes, enabling unified representation and zero-shot generalization across multiple VRP problems, achieving notable performance on ten tasks. MVMoE [41] further boosts model capacity and multi-task performance by introducing a mixture-of-experts model. RouteFinder[2] enhances multi-task training efficiency and performance through mixed batch training and enables rapid adaptation to unseen tasks via efficient adapter layers. CaDA [19] improves the model’s ability to handle diverse tasks within a multi-task framework by incorporating constraint awareness and a dual-branch structure. However, these studies have predominantly focused on small-scale problems, lacking extensive exploration of large-scale generalization capabilities.

## B Problem Definition and Settings

Our VRP variant problem settings follow the work of Zhou et al. [41]. Detailed settings are as follows:

- **Coordinates:** All node coordinates are uniformly sampled from the 2D space  $[0, 1) \times [0, 1)$ .
- **Demands:** For all customer nodes, demands are randomly sampled from the set  $\{1, 2, \dots, 9\}$ .
- **Vehicle Capacity:** Each vehicle has a fixed transportation capacity, which we set to 50 across all problem scales. The sum of demands for nodes visited by a vehicle must be less than or equal to its current capacity.
- **Open Routes:** In open vehicle routing problems, vehicles are not required to return to the depot. We use a binary flag vector to distinguish whether a path is open; setting it to 1 indicates an open path.

Table 4: 16 VRP variants with five constraints.

| Constraint | Capacity | Open Route | Backhaul | Duration Limit | Time Window |
|------------|----------|------------|----------|----------------|-------------|
| CVRP       | ✓        |            |          |                |             |
| OVRP       | ✓        | ✓          |          |                |             |
| VRPB       | ✓        |            | ✓        |                |             |
| VRPL       | ✓        |            |          | ✓              |             |
| VRPTW      | ✓        |            |          |                | ✓           |
| OVRPTW     | ✓        | ✓          |          |                | ✓           |
| OVRPB      | ✓        | ✓          | ✓        |                |             |
| OVRPL      | ✓        | ✓          |          | ✓              |             |
| VRPBL      | ✓        |            | ✓        | ✓              |             |
| VRPBTW     | ✓        |            | ✓        |                | ✓           |
| VRPLTW     | ✓        |            |          | ✓              | ✓           |
| OVRPBL     | ✓        | ✓          | ✓        | ✓              |             |
| OVRPBTW    | ✓        | ✓          | ✓        |                | ✓           |
| OVRPLTW    | ✓        | ✓          |          | ✓              | ✓           |
| VRPBLTW    | ✓        |            | ✓        | ✓              | ✓           |
| OVRPBLTW   | ✓        | ✓          | ✓        | ✓              | ✓           |

- **Backhauls:** In problems involving backhauls, a portion of the nodes have negative demands, referred to as backhaul nodes. We designate 20% of the customer nodes as backhaul nodes, whose demands are randomly sampled from  $\{-1, -2, \dots, -9\}$ .
- **Duration Limit:** Each vehicle has a maximum travel distance limit, which we set to 3.
- **Time Windows:** Customer node time windows are uniformly sampled, and service time is uniformly set to 0.2. Vehicles must visit nodes within their time windows; if a vehicle arrives early, it must wait until the earliest start time. The depot’s time window is set to  $[0, 3]$ , with a service time of 0. Vehicle speed is uniformly set to 1, meaning the time spent traveling on a path equals its distance divided by speed. Notably, for non-open problems, it is crucial to ensure that after visiting the last customer node, the vehicle can return to the depot within its latest allowable time window; this consideration is not necessary for open problems.

By combining different constraints, 16 VRP variants can be formed, as detailed in Table 4.

## C Performance on Real-World Instances

Our test results on Real-World Instances datasets are presented in Tables 5, 6, and 7. All models are trained on instances of size  $N = 100$ . During inference, data augmentation is applied, and a greedy rollout strategy is adopted by default. Some results for comparative models are sourced from MVMoE [41] and RouteFinder [2].

## D Licenses for Code and Datasets

The licenses for the codes and the datasets used in this work are listed in Table 8.

## E Broader Impacts

This research contributes to the field of neural combinatorial optimization by employing advanced machine learning techniques to address large-scale and multi-variant VRP problems. We believe that the proposed multi-task knowledge distillation training framework, heavy decoder model, and Random Reordering Reconstruction (R3C) strategy can provide valuable insights and inspire subsequent work to explore more efficient and effective neural methods for solving large-scale and diverse VRP problems. As a general learning-based approach to solving the VRP, the proposed multi-task knowledge distillation training framework and R3C strategy do not inherently possess any specific potential negative social impacts.

Table 5: Results on small-scale CVRPLIB instances (Set-X) [28]. All models are trained on instances of size  $N = 100$ , and inference utilized data augmentation[17] and greedy rollout by default.

| Set-X      |        | POMO         |               | POMO-MTL |         | MVMOE/4E     |               | MVMOE/4E-L   |               | MTL-KD        |                |
|------------|--------|--------------|---------------|----------|---------|--------------|---------------|--------------|---------------|---------------|----------------|
| Instance   | Opt.   | Obj.         | Gap           | Obj.     | Gap     | Obj.         | Gap           | Obj.         | Gap           | Obj.          | Gap            |
| X-n101-k25 | 27591  | 30138        | 9.231%        | 32482    | 17.727% | 29361        | 6.415%        | <b>29015</b> | <b>5.161%</b> | 29058         | 5.317%         |
| X-n106-k14 | 26362  | 39322        | 49.162%       | 27369    | 3.820%  | 27278        | 3.475%        | 27242        | 3.338%        | <b>26918</b>  | <b>2.109%</b>  |
| X-n110-k13 | 14971  | 15223        | 1.683%        | 15151    | 1.202%  | <b>15089</b> | <b>0.788%</b> | 15196        | 1.503%        | 15407         | 2.912%         |
| X-n115-k10 | 12747  | 16113        | 26.406%       | 14785    | 15.988% | 13847        | 8.629%        | <b>13325</b> | <b>4.534%</b> | 13513         | 6.009%         |
| X-n120-k6  | 13332  | 14085        | 5.648%        | 13931    | 4.493%  | 14089        | 5.678%        | 13833        | 3.758%        | <b>13657</b>  | <b>2.438%</b>  |
| X-n125-k30 | 55539  | 58513        | 5.355%        | 60687    | 9.269%  | 58944        | 6.131%        | 58603        | 5.517%        | <b>57615</b>  | <b>3.738%</b>  |
| X-n129-k18 | 28940  | <b>29246</b> | <b>1.057%</b> | 30332    | 4.810%  | 29802        | 2.979%        | 29457        | 1.786%        | 29309         | 1.275%         |
| X-n134-k13 | 10916  | <b>11302</b> | <b>3.536%</b> | 11581    | 6.092%  | 11353        | 4.003%        | 11398        | 4.416%        | 11363         | 4.095%         |
| X-n139-k10 | 13590  | 14035        | 3.274%        | 13911    | 2.362%  | <b>13825</b> | <b>1.729%</b> | 13800        | 1.545%        | 13911         | 2.362%         |
| X-n143-k7  | 15700  | 16131        | 2.745%        | 16660    | 6.115%  | 16125        | 2.707%        | 16147        | 2.847%        | <b>15955</b>  | <b>1.624%</b>  |
| X-n148-k46 | 43448  | 49328        | 13.533%       | 50782    | 16.880% | 46758        | 7.618%        | 45599        | 4.951%        | <b>45463</b>  | <b>4.638%</b>  |
| X-n153-k22 | 21220  | 32476        | 53.040%       | 26237    | 23.643% | 23793        | 12.125%       | <b>23316</b> | <b>9.877%</b> | 23340         | 9.991%         |
| X-n157-k13 | 16876  | 17660        | 4.646%        | 17510    | 3.757%  | 17650        | 4.586%        | 17410        | 3.164%        | <b>17161</b>  | <b>1.689%</b>  |
| X-n162-k11 | 14138  | 14889        | 5.312%        | 14720    | 4.117%  | 14654        | 3.650%        | 14662        | 3.706%        | <b>14487</b>  | <b>2.469%</b>  |
| X-n167-k10 | 20557  | 21822        | 6.154%        | 21399    | 4.096%  | 21340        | 3.809%        | 21275        | 3.493%        | <b>21053</b>  | <b>2.413%</b>  |
| X-n172-k51 | 45607  | 49556        | 8.659%        | 56385    | 23.632% | 51292        | 12.465%       | 49073        | 7.600%        | <b>47850</b>  | <b>4.918%</b>  |
| X-n176-k26 | 47812  | 54197        | 13.354%       | 57637    | 20.549% | 55520        | 16.121%       | 52727        | 10.280%       | <b>52476</b>  | <b>9.755%</b>  |
| X-n181-k23 | 25569  | 37311        | 45.923%       | 26219    | 2.542%  | 26258        | 2.695%        | 26241        | 2.628%        | <b>25919</b>  | <b>1.369%</b>  |
| X-n186-k15 | 24145  | 25222        | 4.461%        | 25000    | 3.541%  | 25182        | 4.295%        | <b>24836</b> | <b>2.862%</b> | 24711         | 2.344%         |
| X-n190-k8  | 16980  | 18315        | 7.862%        | 18113    | 6.673%  | 18327        | 7.933%        | 18113        | 6.673%        | <b>17539</b>  | <b>3.292%</b>  |
| X-n195-k51 | 44225  | 49158        | 11.154%       | 54090    | 22.306% | 49984        | 13.022%       | 48185        | 8.954%        | <b>46301</b>  | <b>4.694%</b>  |
| X-n200-k36 | 58578  | 64618        | 10.311%       | 61654    | 5.251%  | 61530        | 5.039%        | 61483        | 4.959%        | <b>60978</b>  | <b>4.097%</b>  |
| X-n209-k16 | 30656  | 32212        | 5.076%        | 32011    | 4.420%  | 32033        | 4.492%        | 32055        | 4.564%        | <b>31536</b>  | <b>2.871%</b>  |
| X-n219-k73 | 117595 | 133545       | 13.564%       | 119887   | 1.949%  | 121046       | 2.935%        | 120421       | 2.403%        | <b>118499</b> | <b>0.769%</b>  |
| X-n228-k23 | 25742  | 48689        | 89.142%       | 33091    | 28.549% | 31054        | 20.636%       | 28561        | 10.951%       | <b>28156</b>  | <b>9.378%</b>  |
| X-n237-k14 | 27042  | 29893        | 10.543%       | 28472    | 5.288%  | 28550        | 5.577%        | 28486        | 5.340%        | <b>27789</b>  | <b>2.762%</b>  |
| X-n247-k50 | 37274  | 56167        | 50.687%       | 45065    | 20.902% | 43673        | 17.167%       | 41800        | 12.143%       | <b>41106</b>  | <b>10.281%</b> |
| X-n251-k28 | 38684  | 40263        | 4.082%        | 40614    | 4.989%  | 41022        | 6.044%        | 40822        | 5.527%        | <b>39877</b>  | <b>3.084%</b>  |
| Avg. Gap   |        | 16.629%      |               | 9.820%   |         | 6.884%       |               | 5.160%       |               | <b>4.025%</b> |                |

Table 6: Results on VRPTW instances (Set-Solomon) [26]. All models are trained on instances of size  $N = 100$ , and inference utilized data augmentation[17] and greedy rollout by default.

| Set-Solomon |        | POMO          |               | POMO-MTL      |                | MVMOE/4E      |                | MVMOE/4E-L    |                | MTL-KD         |                |
|-------------|--------|---------------|---------------|---------------|----------------|---------------|----------------|---------------|----------------|----------------|----------------|
| Instance    | Opt.   | Obj.          | Gap           | Obj.          | Gap            | Obj.          | Gap            | Obj.          | Gap            | Obj.           | Gap            |
| R101        | 1637.7 | 1805.6        | 10.252%       | 1821.2        | 11.205%        | 1798.1        | 9.794%         | <b>1730.1</b> | <b>5.641%</b>  | 1768.0         | 7.956%         |
| R102        | 1466.6 | <b>1556.7</b> | <b>6.143%</b> | 1596.0        | 8.823%         | 1572.0        | 7.187%         | 1574.3        | 7.345%         | 1564.4         | 6.668%         |
| R103        | 1208.7 | 1341.4        | 10.979%       | <b>1327.3</b> | <b>9.812%</b>  | 1328.2        | 9.887%         | 1359.4        | 12.470%        | 1379.0         | 14.090%        |
| R104        | 971.5  | 1118.6        | 15.142%       | 1120.7        | 15.358%        | 1124.8        | 15.780%        | 1098.8        | 13.100%        | <b>1074.1</b>  | <b>10.561%</b> |
| R105        | 1355.3 | 1506.4        | 11.149%       | 1514.6        | 11.754%        | 1479.4        | 9.157%         | <b>1456.0</b> | <b>7.433%</b>  | 1465.2         | 8.109%         |
| R106        | 1234.6 | 1365.2        | 10.578%       | 1380.5        | 11.818%        | 1362.4        | 10.352%        | 1353.5        | 9.627%         | <b>1346.1</b>  | <b>9.031%</b>  |
| R107        | 1064.6 | 1214.2        | 14.052%       | 1209.3        | 13.592%        | <b>1182.1</b> | <b>11.037%</b> | 1196.5        | 12.391%        | 1193.9         | 12.145%        |
| R108        | 932.1  | 1058.9        | 13.604%       | 1061.8        | 13.915%        | <b>1023.2</b> | <b>9.774%</b>  | 1039.1        | 11.481%        | 1035.4         | 11.082%        |
| R109        | 1146.9 | 1249.0        | 8.902%        | 1265.7        | 10.358%        | 1255.6        | 9.478%         | <b>1224.3</b> | <b>6.750%</b>  | 1260.0         | 9.861%         |
| R110        | 1068.0 | 1180.4        | 10.524%       | 1171.4        | 9.682%         | 1185.7        | 11.021%        | <b>1160.2</b> | <b>8.635%</b>  | 1199.5         | 12.313%        |
| R111        | 1048.7 | 1177.2        | 12.253%       | 1211.5        | 15.524%        | <b>1176.1</b> | <b>12.148%</b> | 1197.8        | 14.220%        | 1178.7         | 12.396%        |
| R112        | 948.6  | 1063.1        | 12.070%       | 1057.0        | 11.427%        | 1045.2        | 10.183%        | <b>1044.2</b> | <b>10.082%</b> | 1057.2         | 11.448%        |
| RC101       | 1619.8 | 2643.0        | 63.168%       | 1833.3        | 13.181%        | 1774.4        | 9.544%         | <b>1749.2</b> | <b>7.988%</b>  | 1774.0         | 9.520%         |
| RC102       | 1457.4 | <b>1534.8</b> | <b>5.311%</b> | 1546.1        | 6.086%         | 1544.5        | 5.976%         | 1556.1        | 6.771%         | 1588.4         | 8.989%         |
| RC103       | 1258.0 | 1407.5        | 11.884%       | <b>1396.2</b> | <b>10.986%</b> | 1402.5        | 11.486%        | 1415.3        | 12.502%        | 1451.8         | 15.405%        |
| RC104       | 1132.3 | 1261.8        | 11.437%       | 1271.7        | 12.311%        | 1265.4        | 11.755%        | 1264.2        | 11.649%        | <b>1241.6</b>  | <b>9.653%</b>  |
| RC105       | 1513.7 | <b>1612.9</b> | <b>6.553%</b> | 1644.9        | 8.668%         | 1635.5        | 8.047%         | 1619.4        | 6.980%         | 1688.3         | 11.535%        |
| RC106       | 1372.7 | 1539.3        | 12.137%       | 1552.8        | 13.120%        | 1505.0        | 9.638%         | 1509.5        | 9.968%         | <b>1468.8</b>  | <b>7.001%</b>  |
| RC107       | 1207.8 | 1347.7        | 11.583%       | 1384.8        | 14.655%        | 1351.6        | 11.906%        | <b>1324.1</b> | <b>9.625%</b>  | 1367.6         | 13.231%        |
| RC108       | 1114.2 | 1305.5        | 17.169%       | 1274.4        | 14.378%        | 1254.2        | 12.565%        | 1247.2        | 11.939%        | <b>1232.3</b>  | <b>10.600%</b> |
| RC201       | 1261.8 | 2045.6        | 62.118%       | 1761.1        | 39.570%        | 1577.3        | 25.004%        | 1517.8        | 20.285%        | <b>1490.8</b>  | <b>18.149%</b> |
| RC202       | 1092.3 | 1805.1        | 65.257%       | 1486.2        | 36.062%        | 1616.5        | 47.990%        | 1480.3        | 35.520%        | <b>1336.5</b>  | <b>22.356%</b> |
| RC203       | 923.7  | 1470.4        | 59.186%       | 1360.4        | 47.277%        | 1473.5        | 59.521%        | 1479.6        | 60.182%        | <b>1237.8</b>  | <b>34.005%</b> |
| RC204       | 783.5  | 1323.9        | 68.973%       | 1331.7        | 69.968%        | 1286.6        | 64.212%        | 1232.8        | 57.342%        | <b>1066.0</b>  | <b>36.056%</b> |
| RC205       | 1154.0 | 1568.4        | 35.910%       | 1539.2        | 33.380%        | 1537.7        | 33.250%        | <b>1440.8</b> | <b>24.850%</b> | 1448.3         | 25.503%        |
| RC206       | 1051.1 | 1707.5        | 62.449%       | 1472.6        | 40.101%        | 1468.9        | 39.749%        | 1394.5        | 32.671%        | <b>1354.7</b>  | <b>28.884%</b> |
| RC207       | 962.9  | 1567.2        | 62.758%       | 1375.7        | 42.870%        | 1442.0        | 49.756%        | 1346.4        | 39.831%        | <b>1235.9</b>  | <b>28.352%</b> |
| RC208       | 776.1  | 1505.4        | 93.970%       | 1185.6        | 52.764%        | 1107.4        | 42.688%        | 1167.5        | 50.437%        | <b>1064.0</b>  | <b>37.096%</b> |
| Avg. Gap    |        | 28.054%       |               | 21.380%       |                | 20.317%       |                | 18.490%       |                | <b>15.786%</b> |                |

Table 7: Results on large-scale CVRPLIB instances (Set-X) [28]. All models are trained on instances of size  $N = 100$ , and inference utilized data augmentation[17] and greedy rollout by default.

| Set-X       |        | POMO    |         | LEHD          |               | POMO-MTL |         | MVMoe/4E |         | MVMOE/4E-L |         | RF-MVMOE      |                | RF-TE   |         | MTL-KD        |                |
|-------------|--------|---------|---------|---------------|---------------|----------|---------|----------|---------|------------|---------|---------------|----------------|---------|---------|---------------|----------------|
| Instance    | Opt.   | Obj.    | Gap     | Obj.          | Gap           | Obj.     | Gap     | Obj.     | Gap     | Obj.       | Gap     | Obj.          | Gap            | Obj.    | Gap     | Obj.          | Gap            |
| X-n502-k39  | 69226  | 75617   | 9.232%  | 71438         | 3.195%        | 77284    | 11.640% | 73533    | 6.222%  | 74429      | 7.516%  | 76338         | 10.274%        | 71791   | 3.705%  | <b>71124</b>  | <b>2.742%</b>  |
| X-n513-k21  | 24201  | 30518   | 26.102% | <b>25624</b>  | <b>5.880%</b> | 28510    | 17.805% | 32102    | 32.647% | 31231      | 29.048% | 32639         | 34.866%        | 28465   | 17.619% | 25947         | 7.215%         |
| X-n524-k153 | 154593 | 201877  | 30.586% | 280556        | 81.480%       | 192249   | 24.358% | 186540   | 20.665% | 182392     | 17.982% | <b>170999</b> | <b>10.612%</b> | 174381  | 12.800% | 171306        | 10.811%        |
| X-n536-k96  | 94846  | 106073  | 11.837% | 103785        | 9.425%        | 106514   | 12.302% | 109581   | 15.536% | 108543     | 14.441% | 105847        | 11.599%        | 103272  | 8.884%  | <b>101893</b> | <b>7.430%</b>  |
| X-n548-k50  | 86700  | 103093  | 18.908% | 90644         | 4.549%        | 94562    | 9.068%  | 95894    | 10.604% | 95917      | 10.631% | 104289        | 20.287%        | 100956  | 16.443% | <b>89169</b>  | <b>2.848%</b>  |
| X-n561-k42  | 42717  | 49370   | 15.575% | <b>44728</b>  | <b>4.708%</b> | 47846    | 12.007% | 56008    | 31.114% | 51810      | 21.287% | 53383         | 24.969%        | 49454   | 15.771% | 45467         | 6.438%         |
| X-n573-k30  | 50673  | 83545   | 64.871% | 53482         | 5.543%        | 60913    | 20.208% | 59473    | 17.366% | 57042      | 12.569% | 61524         | 21.414%        | 55952   | 10.418% | <b>53466</b>  | <b>5.512%</b>  |
| X-n586-k159 | 190316 | 229887  | 20.792% | 232867        | 22.358%       | 208893   | 9.761%  | 215668   | 13.321% | 214577     | 12.748% | 212151        | 11.473%        | 205575  | 8.018%  | <b>200863</b> | <b>5.542%</b>  |
| X-n599-k92  | 108451 | 150572  | 38.839% | 115377        | 6.386%        | 120333   | 10.956% | 128949   | 18.901% | 125279     | 15.517% | 126578        | 16.714%        | 116560  | 7.477%  | <b>113513</b> | <b>4.668%</b>  |
| X-n613-k62  | 59535  | 68451   | 14.976% | <b>62484</b>  | <b>4.953%</b> | 67984    | 14.192% | 82586    | 38.718% | 74945      | 25.884% | 73456         | 23.383%        | 67267   | 12.987% | 63035         | 5.879%         |
| X-n627-k43  | 62164  | 84434   | 35.825% | 67568         | 8.693%        | 73060    | 17.528% | 70987    | 14.193% | 70905      | 14.061% | 70414         | 13.271%        | 67572   | 8.700%  | <b>65755</b>  | <b>5.777%</b>  |
| X-n641-k35  | 63682  | 75573   | 18.672% | 68249         | 7.172%        | 72643    | 14.071% | 75329    | 18.289% | 72655      | 14.090% | 71975         | 13.023%        | 70831   | 11.226% | <b>67593</b>  | <b>6.141%</b>  |
| X-n655-k131 | 106780 | 127211  | 19.134% | 117532        | 10.069%       | 116988   | 9.560%  | 117678   | 10.206% | 118475     | 10.952% | 119057        | 11.497%        | 112202  | 5.078%  | <b>109748</b> | <b>2.780%</b>  |
| X-n670-k130 | 146332 | 208079  | 42.197% | 220927        | 50.977%       | 190118   | 29.922% | 197695   | 35.100% | 183447     | 25.364% | 168226        | 14.962%        | 168999  | 15.490% | <b>161076</b> | <b>10.076%</b> |
| X-n685-k75  | 68205  | 79482   | 16.534% | 72946         | <b>6.951%</b> | 80892    | 18.601% | 97388    | 42.787% | 89441      | 31.136% | 82269         | 20.620%        | 77847   | 14.137% | 73249         | 7.395%         |
| X-n701-k44  | 81923  | 97843   | 19.433% | 86327         | 5.376%        | 92075    | 12.392% | 98469    | 20.197% | 94924      | 15.870% | 90189         | 10.090%        | 89932   | 9.776%  | <b>85967</b>  | <b>4.936%</b>  |
| X-n716-k35  | 43373  | 51381   | 18.463% | <b>46502</b>  | <b>7.214%</b> | 52709    | 21.525% | 56773    | 30.895% | 52305      | 20.593% | 52250         | 20.467%        | 49669   | 14.516% | 47012         | 8.390%         |
| X-n733-k159 | 136187 | 159098  | 16.823% | 149115        | 9.493%        | 161961   | 18.925% | 178322   | 30.939% | 167477     | 22.976% | 156387        | 14.833%        | 148463  | 9.014%  | <b>142712</b> | <b>4.791%</b>  |
| X-n749-k98  | 77269  | 87786   | 13.611% | 83439         | 7.985%        | 90582    | 17.229% | 100438   | 29.985% | 94497      | 22.296% | 92147         | 19.255%        | 85171   | 10.227% | <b>82295</b>  | <b>6.505%</b>  |
| X-n766-k71  | 114417 | 135464  | 18.395% | 131487        | 14.919%       | 144041   | 25.891% | 152352   | 33.155% | 136255     | 19.086% | 130505        | 14.061%        | 129935  | 13.563% | <b>123310</b> | <b>7.772%</b>  |
| X-n783-k48  | 72386  | 90289   | 24.733% | <b>76766</b>  | <b>6.051%</b> | 83169    | 14.897% | 100383   | 38.677% | 92960      | 28.423% | 96336         | 33.087%        | 83185   | 14.919% | 77332         | 6.833%         |
| X-n801-k40  | 73305  | 124278  | 69.536% | <b>77546</b>  | <b>5.785%</b> | 85077    | 16.059% | 91560    | 24.903% | 87662      | 19.585% | 87118         | 18.843%        | 86164   | 17.542% | 78041         | 6.460%         |
| X-n819-k171 | 158121 | 193451  | 22.344% | 178558        | 12.925%       | 177157   | 12.039% | 183599   | 16.113% | 185832     | 17.525% | 179596        | 13.581%        | 174441  | 10.321% | <b>170672</b> | <b>7.938%</b>  |
| X-n837-k142 | 193737 | 237884  | 22.787% | 207709        | 7.212%        | 214207   | 10.566% | 229526   | 18.473% | 221286     | 14.220% | 230362        | 18.904%        | 208528  | 7.635%  | <b>203165</b> | <b>4.866%</b>  |
| X-n856-k95  | 88965  | 152528  | 71.447% | <b>92936</b>  | <b>4.464%</b> | 101774   | 14.398% | 99129    | 11.425% | 106816     | 20.065% | 105801        | 18.924%        | 98291   | 10.483% | 94079         | 5.748%         |
| X-n876-k59  | 99299  | 119764  | 20.609% | <b>104183</b> | <b>4.918%</b> | 116617   | 17.440% | 119619   | 20.463% | 114333     | 15.140% | 114016        | 14.821%        | 107416  | 8.174%  | 105873        | 6.620%         |
| X-n895-k37  | 53860  | 70245   | 30.421% | <b>58028</b>  | <b>7.739%</b> | 65587    | 21.773% | 79018    | 46.710% | 64310      | 19.402% | 69099         | 28.294%        | 64871   | 20.444% | 58606         | 8.812%         |
| X-n916-k207 | 329179 | 399372  | 21.324% | 385208        | 17.021%       | 361719   | 9.885%  | 383681   | 16.557% | 374016     | 13.621% | 373600        | 13.494%        | 352998  | 7.236%  | <b>346940</b> | <b>5.396%</b>  |
| X-n936-k151 | 132715 | 237625  | 79.049% | 196547        | 48.097%       | 186262   | 40.347% | 220926   | 66.466% | 190407     | 43.471% | 161343        | 21.571%        | 163162  | 22.942% | <b>152094</b> | <b>14.602%</b> |
| X-n957-k87  | 85465  | 130850  | 53.104% | <b>90295</b>  | <b>5.651%</b> | 98198    | 14.898% | 113882   | 33.250% | 105629     | 23.593% | 123633        | 44.659%        | 102689  | 20.153% | 90407         | 5.782%         |
| X-n979-k58  | 118976 | 147687  | 24.132% | 127972        | 7.561%        | 138092   | 16.067% | 146347   | 23.005% | 139682     | 17.404% | 131754        | 10.740%        | 129952  | 9.225%  | <b>127650</b> | <b>7.291%</b>  |
| X-n1001-k43 | 72355  | 100399  | 38.759% | <b>76689</b>  | <b>5.990%</b> | 87660    | 21.153% | 114448   | 58.176% | 94734      | 30.929% | 88969         | 22.962%        | 85929   | 18.760% | 78833         | 8.953%         |
| Avg. Gap    |        | 29.658% |         | 12.836%       |               | 16.796%  |         | 26.408%  |         | 19.607%    |         | 18.795%       |                | 12.303% |         | <b>6.655%</b> |                |

Table 8: Licenses of Used Codes and Datasets

| Type    | Resource           | License Type                        | URL / Reference                                                                                                                           |
|---------|--------------------|-------------------------------------|-------------------------------------------------------------------------------------------------------------------------------------------|
| Code    | MVMOE[41]          | MIT License                         | <a href="https://github.com/RoyalSkye/Routing-MVMOE">https://github.com/RoyalSkye/Routing-MVMOE</a>                                       |
| Code    | MT-POMO[21]        | MIT License                         | <a href="https://github.com/FeiLiu36/MTNCO">https://github.com/FeiLiu36/MTNCO</a>                                                         |
| Code    | HGS-PyVRP[33]      | MIT License                         | <a href="https://github.com/PyVRP/PyVRP">https://github.com/PyVRP/PyVRP</a>                                                               |
| Code    | OR-Tools[8]        | Apache License                      | <a href="https://github.com/google/or-tools">https://github.com/google/or-tools</a>                                                       |
| Dataset | CVRPLIB(Set-X)[28] | Available for academic research use | <a href="http://vrp.galgos.inf.puc-rio.br/index.php/en/">http://vrp.galgos.inf.puc-rio.br/index.php/en/</a>                               |
| Dataset | Solomon[26]        | Available for academic research use | <a href="https://www.sintef.no/projectweb/top/vrptw/solomon-benchmark/">https://www.sintef.no/projectweb/top/vrptw/solomon-benchmark/</a> |
